# Supplementary material for: Association of Pulmonary Function with Osteosarcopenic Obesity in Older Adults Aged over 50 Years
Source: MDPI journal article supplement (doi:10.3390/nu15132933), 2023-06-28
Supplement: s1 [file s1]

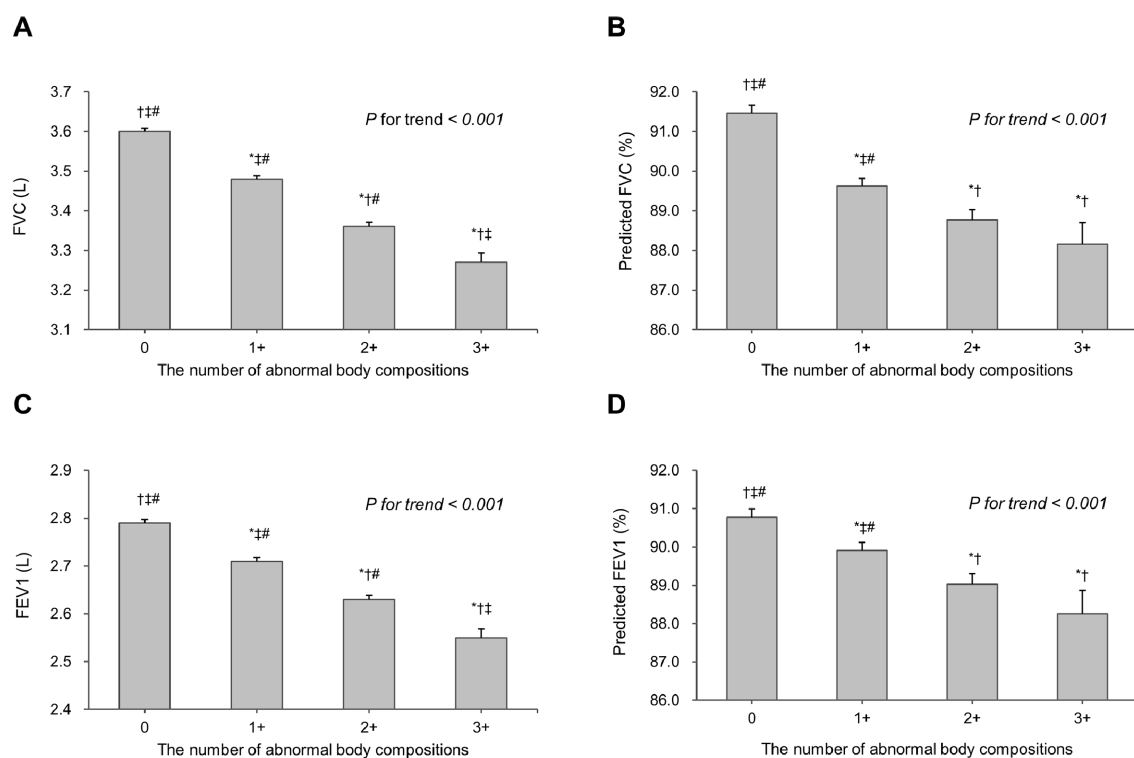

**Supplementary Figure S1.** Pulmonary Function Mean Values (SE) According to Abnormal Body Compositions.

\*Adjusted  $p < 0.05$  compared with the normal group in post hoc analysis.

†Adjusted  $p < 0.05$  compared with the one component group in post hoc analysis.

#Adjusted  $p < 0.05$  compared with the two component group in post hoc analysis.

‡Adjusted  $p < 0.05$  compared with the OSO group in post hoc analysis.
